# Supplementary material for: Not as black as it is painted? The impact of the first wave of COVID-19 pandemic on surgical treatment of urological cancer patients in Poland – a cross-country experience
Source: PubMed Central journal article supplement — Arch Med Sci. 2023 Jan 13;19(1):107–15. doi: 10.5114/aoms/130927 (PMC9897107; doi:10.5114/aoms/130927), 2023-01-13
Supplement: AMS-19-1-130927-s1.pdf [file AMS-19-1-130927-s1.pdf]

Supplementary Table S1. Characteristics of participating centres

| Institution                                                                                                                                 | Urology staff members | Beds | Academic vs. non-academic | Temporary lockdown of the department | Surgical limitations due to local pandemic policy                                                                                                        | Surgical limitations due to other factors                                                   |
|---------------------------------------------------------------------------------------------------------------------------------------------|-----------------------|------|---------------------------|--------------------------------------|----------------------------------------------------------------------------------------------------------------------------------------------------------|---------------------------------------------------------------------------------------------|
| Department of General, Oncological, and Functional Urology, Medical University of Warsaw                                                    | 22                    | 40   | Academic                  | No                                   | No limitations for oncology                                                                                                                              | Outpatient clinic not working                                                               |
| Department of Urology, Medical University of Silesia, Zabrze, Poland.                                                                       | 12                    | 22   | Academic                  | No                                   | Planned procedures and low-risk oncological procedures postponed                                                                                         | Anaesthesiological and urological staff deployed                                            |
| Department of General and Oncologic Urology, Antoni Jurasz University Hospital No. 1 in Bydgoszcz                                           | 16                    | 32   | Academic                  | No                                   | Planned procedures and low-risk oncological procedures postponed                                                                                         | – Anaesthesiological and urological staff deployed<br>– Limited access to operating theatre |
| Department of Urology, Centre of Postgraduate Medical Education, Professor W. Orłowski Independent Public Teaching Hospital, Warsaw, Poland | 15                    | 20   | Academic                  | No                                   | Planned procedures and low-risk oncological procedures postponed                                                                                         | Anaesthesiological and urological staff deployed                                            |
| Department of Urology, Jagiellonian University, Medical College, Cracow, Poland                                                             | 22                    | 45   | Academic                  | No                                   | – Minor part of department transformed into gynaecological subunit<br>– Non-oncological planned procedures and low-risk oncological procedures postponed | – Limited access to operating theatre<br>– Outpatient clinic not working                    |
| Department of Urology, Faculty of Medicine, University of Warmia and Mazury, Olsztyn, Poland                                                | 6                     | 12   | Academic                  | No                                   | Non-oncological planned procedures and low-risk oncological procedures postponed                                                                         | – Urological staff quarantined<br>– Anaesthesiological staff deployed                       |
| Department of Urology, Roefler Memorial Hospital                                                                                            | 5                     | 20   | Non-Academic              | No                                   | No limitations for oncology                                                                                                                              | None                                                                                        |
| Department of Urology and Oncologic Urology, Wrocław Medical University                                                                     | 14                    | 29   | Academic                  | No                                   | No limitations for oncology                                                                                                                              | None                                                                                        |
| Department of Urology, Jan Bizieli University Hospital, Collegium Medicum in Bydgoszcz, Nicolaus Copernicus University in Torun             | 12                    | 26   | Academic                  | 15 Apr, 2020 – 21 Apr, 2020          | – Minor part of department transformed into an isolation ward<br>– Non-oncological planned procedures and low-risk oncological procedures postponed      | Anesthesiological staff deployed                                                            |
| Department of Urology and Urooncology, Multispecialty Regional Hospital in Gorzów Wielkopolski                                              | 9                     | 24   | Non-Academic              | No                                   | No limitations for oncology                                                                                                                              | Outpatient clinic activity limited to oncology                                              |
